# Supplementary material for: Structure-Function Correlations in Sputter Deposited Gold/Fluorocarbon Multilayers for Tuning Optical Response
Source: Preprints.org preprint supplement (doi:10.20944/preprints201906.0287.v1), 2019-06-27
Supplement: Supplementary file 1 [file supplementary]

(listing pending)
